# Supplementary material
Source: MDPI journal article supplement (https://www.mdpi.com/2076-3417/7/2/135)
Supplement: s1 [file s1]

Supplementary Materials: Composition Distribution, Damping and Thermal Properties of the Thickness-Continuous Gradient Epoxy/Polyurethane Interpenetrating Polymer Networks

Xuesong Lv, Zhixiong Huang, Minxian Shi, Yun Fan and Guanbin Gao

1. About the PGMs

Up to now, there are a lot of articles can be found on the net about the fabricating and analyzing of the polymer gradient/graded materials or the bilayer materials. But topics of these articles are mainly about the fabricating method, mechanical or the biological properties (as cell growth substrates). Besides, fabrications of these PGMs need heavily on the devices and expensive.

Taking advantage of the relative poor compatibility and the curing rates discrepancy between epoxy (EP) and polyurethane (PU) resins, we fabricated a composition gradient-distributing interpenetrating polymer networks (IPN), simply and inexpensively. And our research is mainly focused on the damping analysis. So far as we know, there are no papers have been published before about this kind of damping materials.

A Detailed Comparison Is Listed Below:


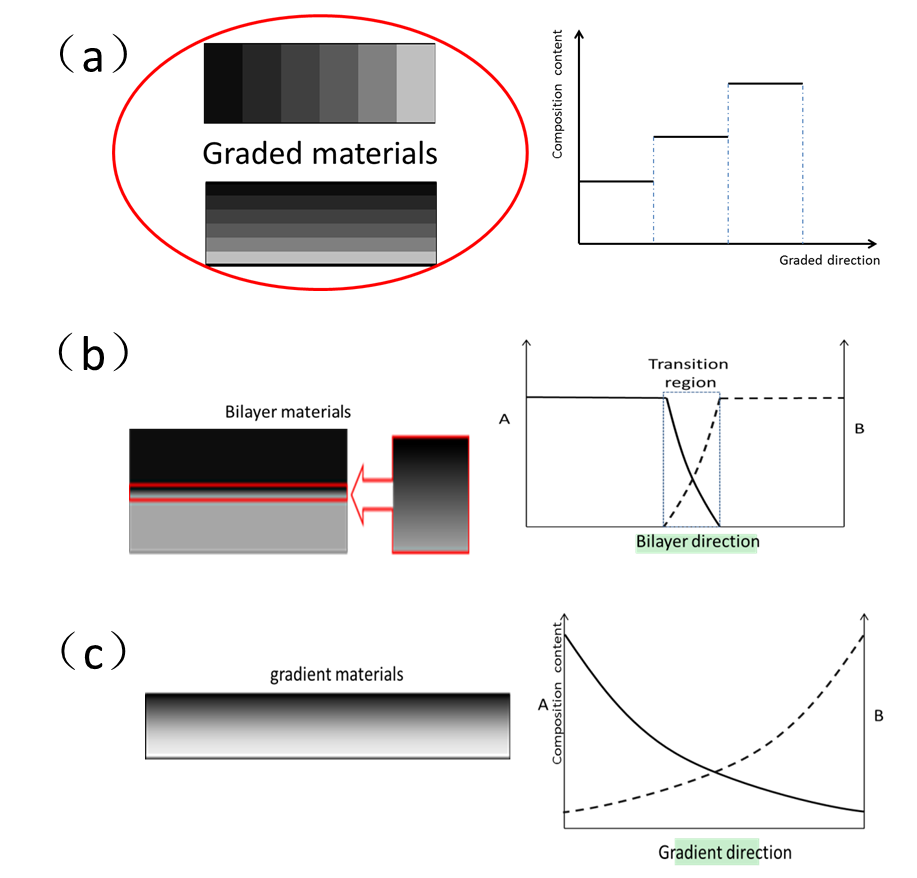


**Figure S1.** Schematic illustrations of the graded/bilayer/gradient materials, (**a**) the graded materials; (**b**) the bilayer material; (**c**) the gradient material.

Graded materials consist of a layered structure where the layer composition changes stepwise along one axis. The graded material consists of multiple discrete sections. Properties are stepwise different from the adjacent sections. In the bilayer materials, there is usually a thin transition region. The compositions are constant before the region and compositions usually experience a sharp change in the transition zone. But in the gradient materials, the compositions change gradually with no sharp interfaces.

2. Ways to Fabricate the PGMs

Ways to generate the polymer gradient materials (PGMs) published in the articles are usually those as below.

(a) The electrophoresis method. This method is realized using the migration of the polymer ions under the electric field in the polymer solutions. The polymers are then cured by the evaporations of the solvent or the polymerizations of the polymers.

(b) The gradient distributing of the fillers are realized by the gravity or the centrifugal force. This method is mainly concentrate on the distributing of the fillers, other than the gradient distributing of the component resins.

(c) The temperature difference of the mold of the surfaces can also be utilized to generate the gradient structure of the polymers. This fabricating method is based on the different curing rate of the compositions under different environment (temperatures). The frontal polymerization is a typical example of this method.

(d) The photopolymerization. The Irradiation polymerization using a shield is a common technique for the fabricating of the gradient IPN materials. The gradient structure is realized by artificially controlling the exposure time.

(e) By using the microfluidic setups. Microfluidic technique is a useful way for the synthesis of materials with defined compositions. This method possesses the ability to control the accurate content of the resins in a gradient material. But the devices are not purchasable on the market and are not easy to make by the material scientists as well.

(f) The layer-by-layer method. By subsequently casting blend solutions of different polymers with variable compositions onto a substrate, PGMs are obtained after evaporation of the solvents and the diffusion of the polymers. This method needs the operators to have an accurate controlling of the solvents evaporations and resins migration rate. This is complicated for the operators. Usually, it is more suitable for the generation of the multi-layer structures.

(g) The dissolution/diffusion methods. The main polymers are usually swelling in a solvent (containing the second kind of monomers). The second kind of monomers is then cured by the in-situ polymerization or the solvent evaporations before the balance of the diffusion.

(h) The surface/interface tension difference. This method has been published in some articles. The surface/interface tension difference and the poor compatibility of the resins are the driving force for the self-gradient phenomenon of the materials.

To sum up, all the means mentioned above for the fabrication of the PGMs need heavily on the devices and are expensive, such as the microfluidic techniques. Besides, those methods are complicated to operate and time-consuming.

As far as know, several kinds of the PGMs generated applying the difference of the surface/interface tensions are about the PDMS/PMMA system, other than the EP/PU IPN composite. This kind of the EP/PU gradient IPN composite is realized applying to the surface/interface tension difference, the absorption to the mold and the curing rate discrepancies of the components. This method for the fabricating of the gradient materials is simple, cheap and easy to operate. None of this kind of gradient material has been published before.

Besides, papers published before of the PGMs are about their mechanical properties or the transmissions of the light. They are usually used as the cell growth substrates, the semipermeable membrane and the optical fibers. Differ from the PGMs mentioned above; the gradient EP-PU IPN material is used as the damping materials. The concerns of the paper are about the self-gradient mechanism, damping ability under different temperatures or frequencies and the fatigue durability.

What’s more, the gradient materials can be used as a replacement of the constrained damping structures (the gradient material can be directly generated on the substrates. The soft sides of the gradient structure will act as the cores while the hard sides are exposed outside, acting as the constrained layers). This is another novelty of this article. But damping performances of the structures are a complicated issue (including the thickness ratios, shape etc.). This is not included in this manuscript.

3. Other Groups of the Gradient Structure

In order to identify the continuous gradient structure of the IPN material, I have used the SEM, ATR-FTIR, CHNS/O and SEM-EDX test.

Besides, in order to identify the relationship between the pre-curing time and the gradient structure, samples which are fabricated using the same mechanism but experienced different pre-cured time were fractured for SEM scanning.


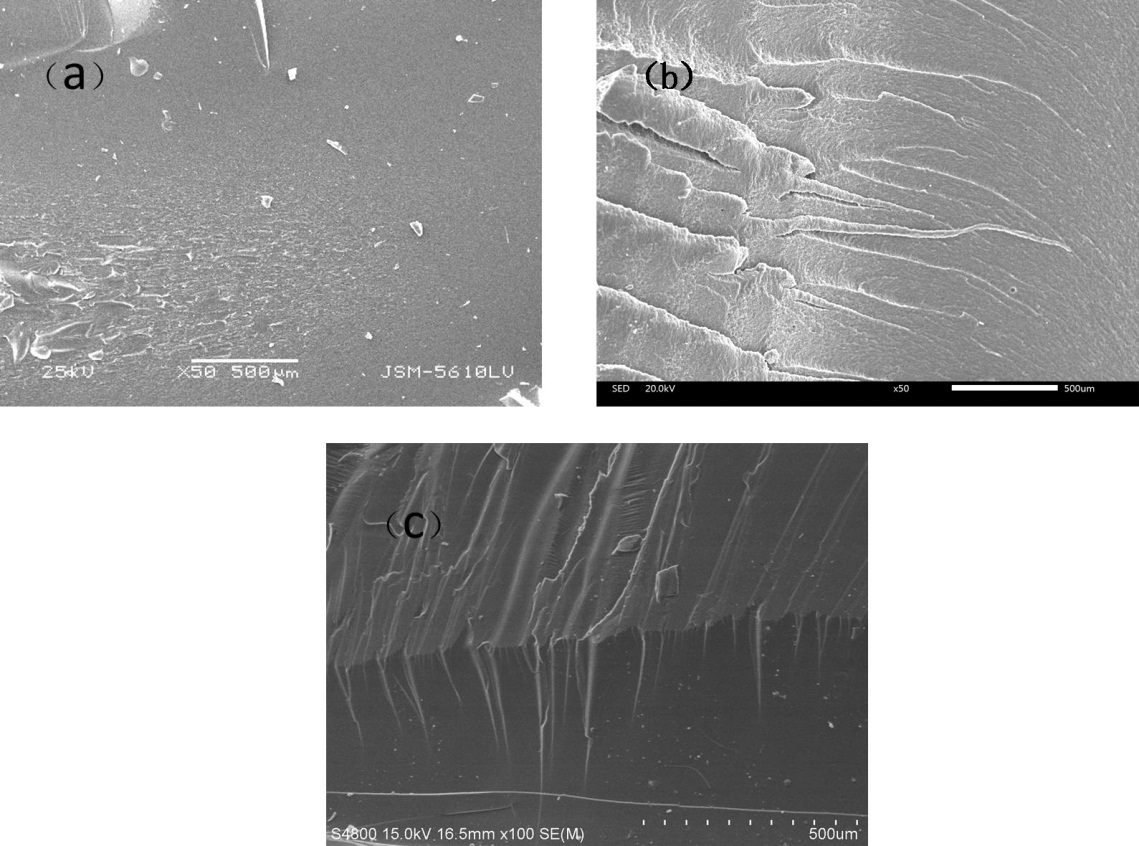


**Figure S2.** Relationship between the procuring time and the gradient structures. The component ratio EP/PU = 60/40. Procuring temperature is 10 °C. (**a**) Pre-cured for 0.5 h; (**b**) pre-cured for 24 h; (**c**) pre-cured for 48h.

Obviously, with the pre-curing time increases, the fracture of the samples experienced from slightly phase separation (Figure S2a) to the completely delamination (Figure S2c).


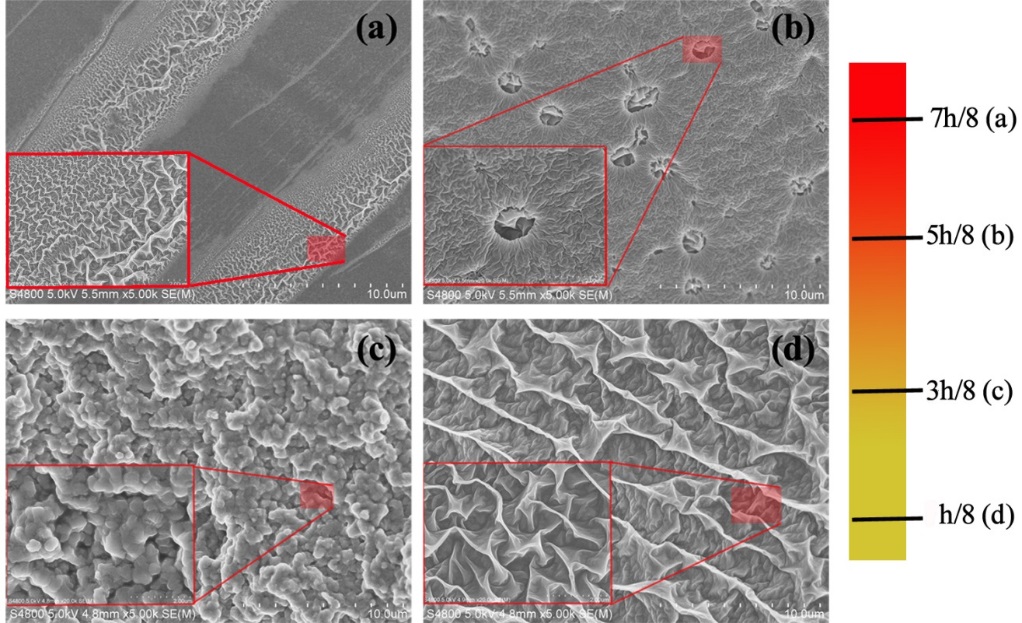


**Figure S3.** SEM picture of the gradient IPN composite (PU/EP = 40/60).

Figure S3 above is the fracture surface of the gradient composite (PU/EP = 40/60). The gradient structure is well represented by this method.


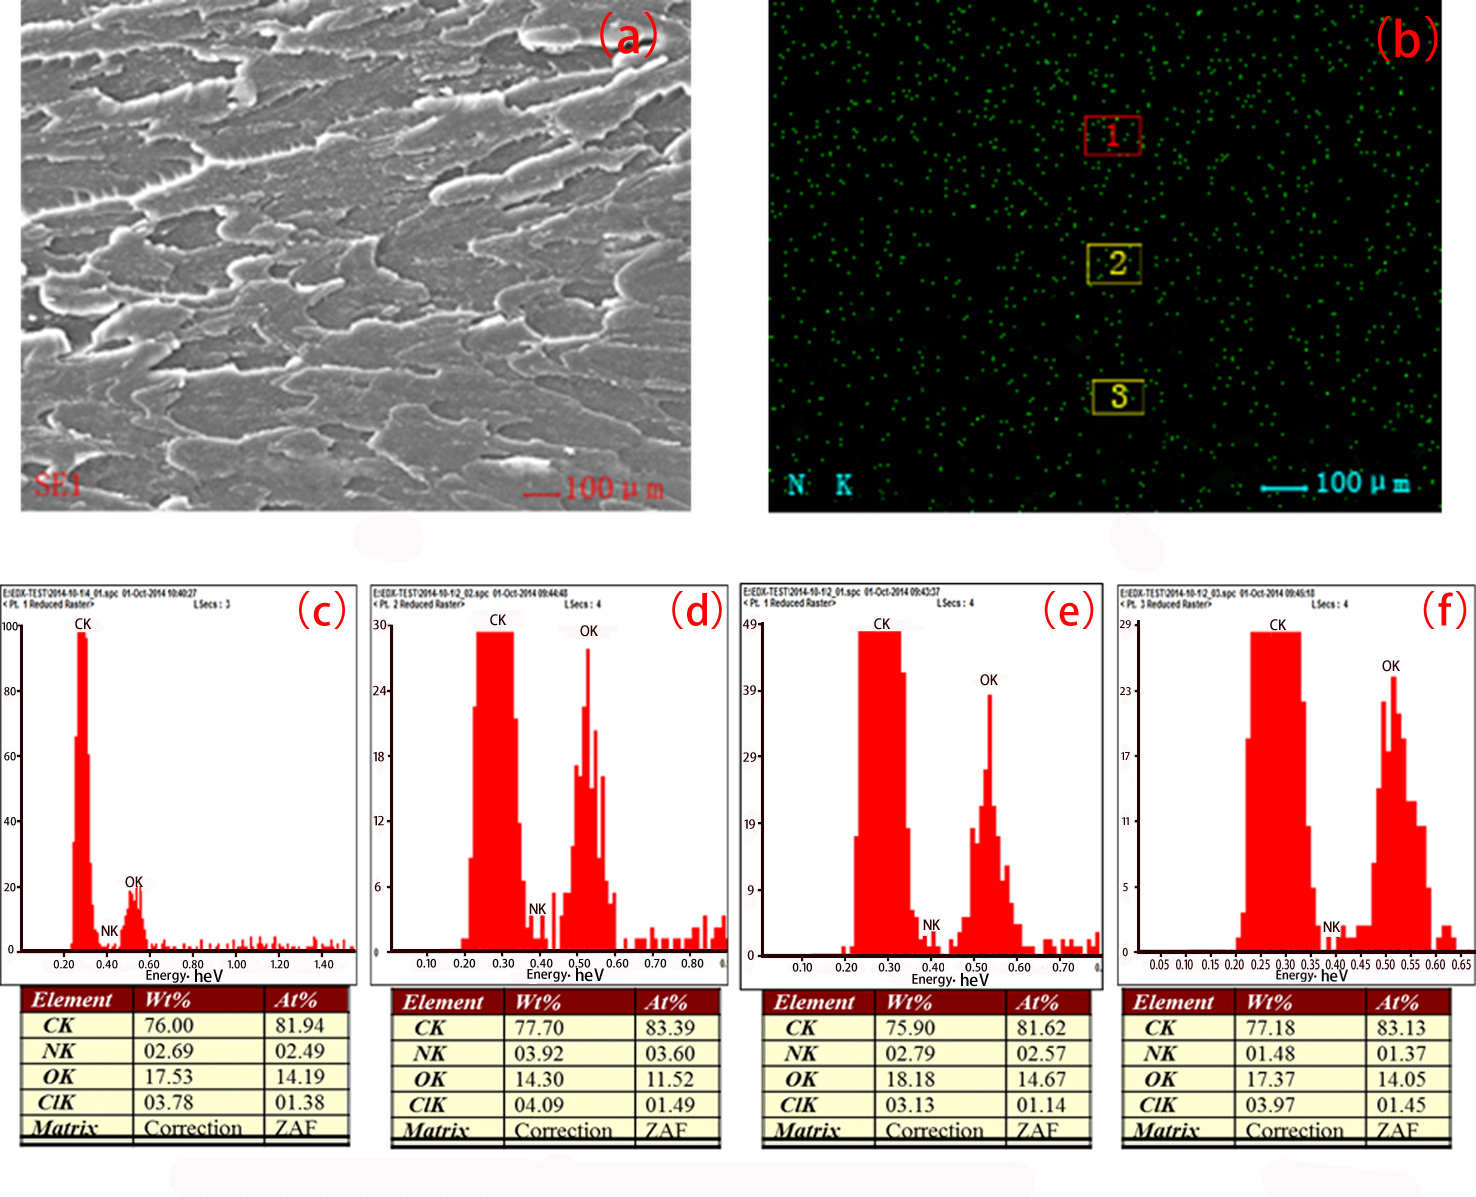


**Figure S4.** Scanning electron microscopy/energy-dispersive X-ray technique (SEM-EDX) analysis of the 70/30 (EP/PU) gradient material. Figure S4a is the fracture surface of the gradient material. Figure S4b is the nitrogen distribution of Figure S4a and the chosen region for the element content analysis. Figure S4c is the whole nitrogen content of the fracture surface. Figure S4d, Figure S4e and Figure S4f are the detailed data of the chosen regions in Figure 4b.

Figure S4c is the whole N atom content in Figure S4a, the relative N content is 2.69% by weight. Figure S4d is the N content in the chosen region 1, the data is 3.92% by weight. Figure S4e is the N content in region 2, the relative data is 2.57% by weight. Figure S4f is the N content in region 3, data here is 1.37% by weight.

3.1. CHNS/O Analysis

For the sake of a further understanding of the distribution of resins in the gradient structure, element analysis (CHNS/O analysis) was employed. On account of the nitrogen atom exists only in PU phase, detection of components distribution can be simplified to assaying of the nitrogen content [46]. According to the Sach’s method, samples are divided into 100 layers from the surface to bottom by utilizing the microtome with a thickness of 21.7μm per layer. Layers of the 7th, 8th, 36th, 37th, 69th, 70th, 94th and 95th are randomly selected from slices for determination. Corresponding results are shown in Table S1.

**Table S1.** Element distribution of the selected slices from the sample.

| **Layer No.** | **Mass (mg)** | **N Content (%)** | **C Content (%)** | **H Content (%)** |
| --- | --- | --- | --- | --- |
| 7th | 5.101 | 0.730 | 63.860 | 7.394 |
| 8th | 5.003 | 0.730 | 63.900 | 7.387 |
| 36th | 5.086 | 0.840 | 64.160 | 7.561 |
| 37th | 5.109 | 0.810 | 64.240 | 7.551 |
| 69th | 5.205 | 1.160 | 66.130 | 7.621 |
| 70th | 5.215 | 1.130 | 66.140 | 7.719 |
| 94th | 5.011 | 1.260 | 69.610 | 8.130 |
| 95th | 5.251 | 1.300 | 70.110 | 7.919 |

Since the average thickness of the slices is known (21.5μm), distances of the chosen regions to the top surface can also be got. Data (including distance to top surface and the N content) used in Figure S4 are the average between the adjacent layers.

Conclusion can be drawn from Figure S4 is that nitrogen element is nonlinearity distributed in the samples, which indicating the same distribution of polyurethane.

Special explanation should be made here is that the SEM-EDX analysis (EP/PU = 70/30) result is higher than the CHNS/O analysis (EP/PU = 60/40). Three reasons can be used to clarify this abnormal result.

Firstly, the measuring mechanism of the SEM-EDX (the X-ray) and the CHNO/S (combustion) test are different. Secondly, the instruments are produced by two different factories and being operated by different operators. Thirdly, the SEM-EDX analysis is more suitable for atoms that heavier than nitrogen. The nitrogen is too light that it is only appropriate for the semiquantitative analysis for this instrument.

3.2. ATR-FTIR Analysis of the Gradient IPN

Spectral regions of interest in FT-IR should be separated sufficiently far to reflect the gradient. This is because the content of the components changes continuously along the direction of thickness without any abrupt variations.

Regions near the 1/8 h, 1/2 h and 7/8 h (from the bottom to the surface) along the direction of thickness in the fracture surface are chosen for the ATR-FTIR detections.


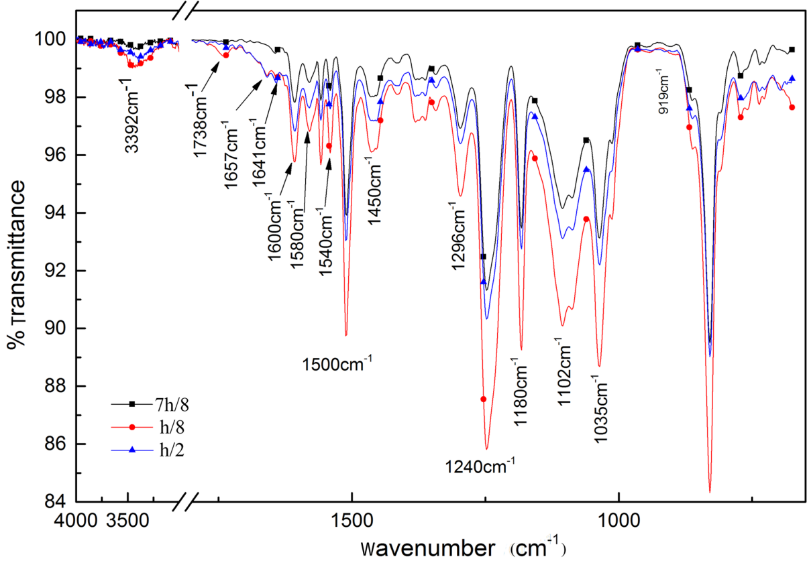


**Figure S5.** ATR-FTIR results of the chosen regions of the gradient sample. Devices applied here have been revised before detection and all curves here have subtracted the baseline.

Absorption bands at 3392 and 1641 cm−1 are the characteristic peaks of the amine group. It is clear that there is little absorption near the surface layer (7/8 h), which indicates little distribution of the PU phase. On the contrary, absorption bands in the middle and bottom regions reveal that quiet amount of contents. The peak at 1738 cm−1 is the characteristic absorption of the ester group (in elastomer). The band at 1180 cm−1 is the carbon-oxygen single bond’s asymmetrical stretching vibration of the ester group. Only near the bottom is enough content to show a distinct reflection versus the other locations. Band at this point prove that the PU phase (ester group) is mainly concentrated in the bottom areas. Peaks at 1657, 1540 cm−1 as well as 1240 cm−1 are the characterized absorption peaks of the acylamino groups. This proves that only a trace of the PU phase is located near the surface. Bands at 1296, 1102 and 1035 cm−1 offer the exiting evidence of the ether bonds. It is well known that PU contains abundant ether bonds relative to EP. The obvious absorption differences of the ether bonds also reveal gradient distribution of the PU phase along the direction of the samples. Because of the intense absorpations of PU, characteristic peaks of EP is hard to read. Since the mechanism analysis above has proved that the mixture can create a gradient structure. We can safely say that the mixture resin has generated the gradient structure through the stepwise curing process.

3.3. FTIR Absorption of the Homogeneous IPN

Mixture (EP/PU = 40/60) that cured under 80 °C will cure within half an hour, the time that it takes to gel must be less. Different from the continuous gradient IPN, Mixture that cured within a short time would be homogeneous. Properties such as the elasticity modulus, elemental distribution, etc. should be all the same in everywhere of the samples. For a detailed insight of the mixture (cured under 80 °C), infrared absorption was done using a Thermo Nicolet FTIR spectrometer (Nexus) using KBr pellets. Locations that chose from the cured resin were the same as the gradient IPN.


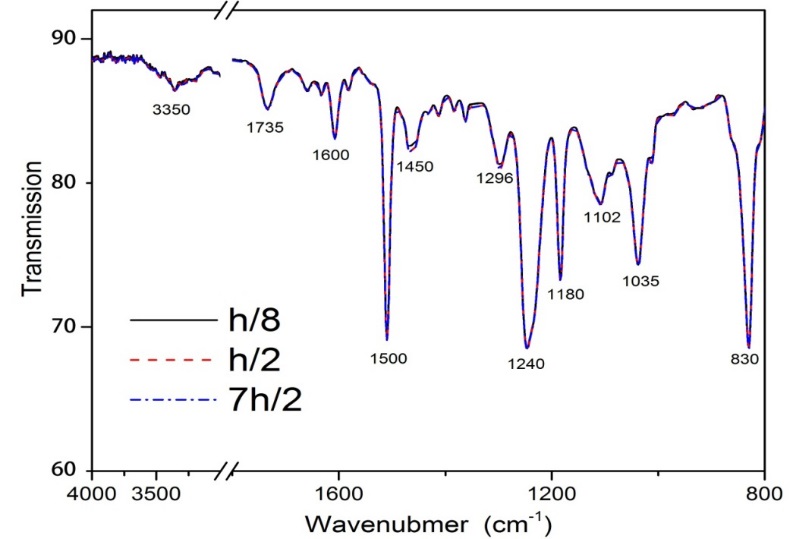


**Figure S6.** FTIR spectra of the locations chosen from the homogeneous IPN.

Comparing these three infrared absorption spectrums acquired from different locations in the material, nearly no difference can be found. This proved that the mixture cured under 80 °C has a homogeneous structure. Association peaks from 3100 to 3500 cm−1 plus with the band at 1650 cm−1 confirm the existence of secondary amide root. Peaks at 1657 cm−1 as well as 1240 cm−1 are ascribed to the acylamino groups. The peak at 1735 cm−1 is the characteristic absorption of the ester group (in elastomer). Band at 1180 cm−1 corresponds to the carbon-oxygen single bond’s asymmetrical stretching vibration of the ester group. Bands around 1296, 1102 and 1035 cm−1 offer the exiting evidence of the ether bonds. Bands around 1600, 1580, 1500 and 1450 cm−1 are attributed to the vibrations of C=C stretching deformation of quinoid and benzene ring respectively. Band of triazine ring is located at 1709 cm−1, figure above shows that there were no absorption peak at this point, which proves that there are no trimerization of isocyanate root.

I list some of the test results that I think they might be useful to prove the gradient structure. Even some of the pictures come from different group (component ratio) of the gradient materials. But they are all fabricated using the same mechanism.
